# Supplementary material
Source: publisher site journal article supplement (https://www.spandidos-publications.com/893/downloadSupplementary)

Figure S1. Confirmation of ROCK2 overexpression after transfection. The overexpression of ROCK2 was confirmed by quantitative PCR to measure the mRNA expression levels. \* $P < 0.05$ . ROCK2, rho associated coiled-coil containing protein kinase 2; C, control; NC, negative control.

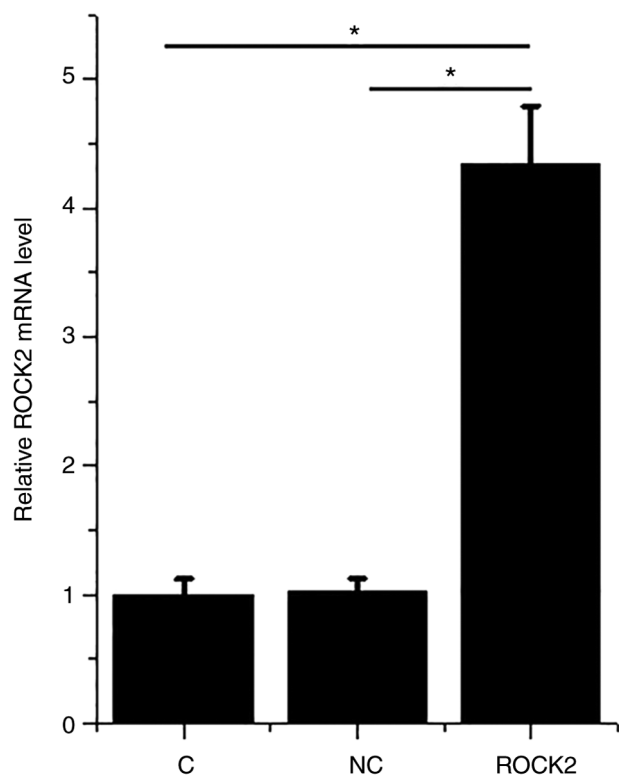

Supplement: Supplementary file 1 [file downloadSupplementary]
